# Supplementary material for: Quantifying changes in the T cell receptor repertoire during thymic development
Source: eLife journal article supplement (doi:10.7554/elife.81622), 2023-01-20
Supplement: supp [file elife-81622-supp-v1.zip]

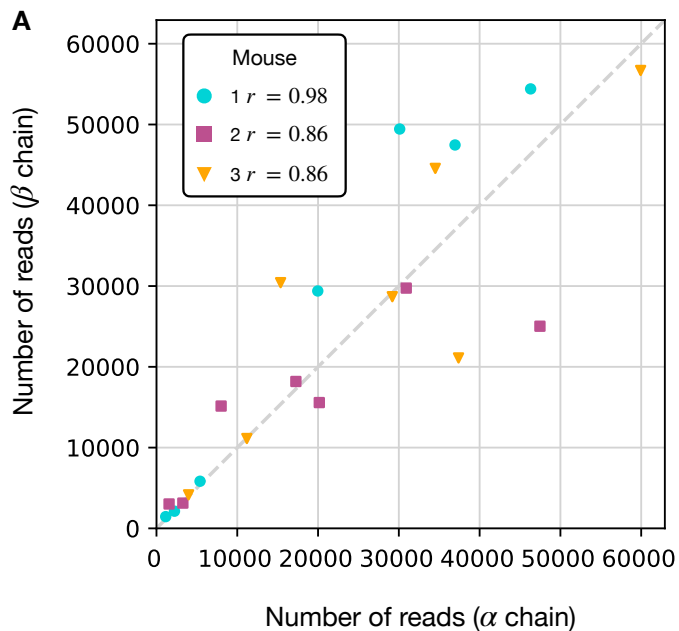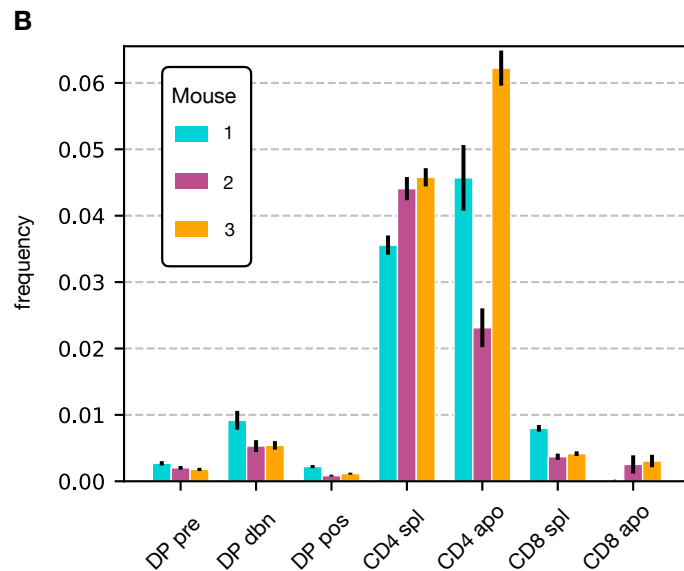

**C**

| $\alpha$ Stage | Mouse 1 | Mouse 2 | Mouse 3 |
|----------------|---------|---------|---------|
| DP pre         | 26555   | 26827   | 29977   |
| DP dbn         | 4608    | 6720    | 13232   |
| DP pos         | 40819   | 41335   | 52041   |
| CD4 spl        | 17573   | 15159   | 25438   |
| CD4 apo        | 1958    | 2767    | 9458    |
| CD8 spl        | 32584   | 17421   | 32244   |
| CD8 apo        | 988     | 1349    | 3473    |

**D**

| $\beta$ Stage | Mouse 1 | Mouse 2 | Mouse 3 |
|---------------|---------|---------|---------|
| DP pre        | 46980   | 28341   | 42494   |
| DP dbn        | 5491    | 14066   | 28531   |
| DP pos        | 51869   | 24004   | 54289   |
| CD4 spl       | 28087   | 17377   | 27516   |
| CD4 apo       | 2008    | 2866    | 10196   |
| CD8 spl       | 45143   | 14865   | 20174   |
| CD8 apo       | 1375    | 2816    | 3834    |
