# Supplementary material for: Quantifying changes in the T cell receptor repertoire during thymic development
Source: eLife. 2023 Jan 20;12:e81622. doi: 10.7554/eLife.81622 (PMC9934861; doi:10.7554/eLife.81622)
Supplement: Supplementary file 2. [file elife-81622-supp2.xlsx]

## Sheet: Table S2
# Sample	mouse	sample name	organ	markers	phenotype	preparation	# Cells	m(ng) taken for RT	RIN	qPCR_cycles	qPCR_ng/ul	peak Size [bp]	% correct peak	peak conc [ng/ul]	peak conc [nM]	P7 index	P7 IDX seq	P5 index	P5 IDX seq
1	6	Ex15_M6A_DP_pre	Thymus	CD4+ CD8+ CD3+ Ann- Nur77-	DP_pre	FACS	612000	63.36	8.9	13	11.2	617	0.846	9.4752	23.626	A10	AACAATGG	D12	TTAATC
2	6	Ex15_M6A_DP_pos	Thymus	CD4+ CD8+ CD3+ Ann- Nur77+	DP_pos	FACS	1079000	134.4	8.8	13	15.6	618	0.838	13.0728	32.5437	A10	AACAATGG	E12	AGGTGC
3	6	Ex15_M6A_DP_DBN	Thymus	CD4+ CD8+ CD3+ Ann+ Nur77-	DP_DBN	FACS	186500	all	7.4	20	12.6	615	0.8363	10.5374	26.3599	A10	AACAATGG	F12	CTGTGG
4	6	Ex15_M6A_CD4_negS	Thymus	CD4+ CD3+ Ann+	CD4_negS	FACS	55500	all	9.5	20	7.79	617	0.8874	6.91285	17.2369	A10	AACAATGG	G12	GCCGCA
5	6	Ex15_M6A_CD8_negS	Thymus	CD8+ CD3+ Ann+	CD8_negS	FACS	23000	all	8.2	20	5.96	629	0.7158	4.26617	10.4346	A10	AACAATGG	H12	TTATAT
6	6	Ex15_M6A_CD4_spl	Spleen	CD4+	spleen_CD4	Miltenyi	1000000	193.6	8.4	13	17.2	614	0.8715	14.9898	37.559	A10	AACAATGG	D11	TGCAAG
7	6	Ex15_M6A_CD8_spl	Spleen	CD8+	spleen_CD8	Miltenyi	1000000	230.4	8.2	13	7.65	629	0.8916	6.82074	16.6827	A10	AACAATGG	E11	AGCATG
8	6	Ex15_M6B_DP_pre	Thymus	CD4+ CD8+ CD3+ Ann- Nur77-	DP_pre	FACS	612000	63.36	8.9	13	13.2	631.714	0.689543	9.10197	22.1667	A10	AACAATGG	D12	TTAATC
9	6	Ex15_M6B_DP_pos	Thymus	CD4+ CD8+ CD3+ Ann- Nur77+	DP_pos	FACS	1079000	134.4	8.8	13	15.2	633	0.6975	10.602	25.7674	A10	AACAATGG	E12	AGGTGC
10	6	Ex15_M6B_DP_DBN	Thymus	CD4+ CD8+ CD3+ Ann+ Nur77-	DP_DBN	FACS	186500	all	7.4	20	21.2	631	0.6796	14.4075	35.1274	A10	AACAATGG	F12	CTGTGG
11	6	Ex15_M6B_CD4_negS	Thymus	CD4+ CD3+ Ann+	CD4_negS	FACS	55500	all	9.5	20	12.2	632	0.7176	8.75472	21.3114	A10	AACAATGG	G12	GCCGCA
12	6	Ex15_M6B_CD8_negS	Thymus	CD8+ CD3+ Ann+	CD8_negS	FACS	23000	all	8.2	20	4.89	634	0.7002	3.42398	8.30861	A10	AACAATGG	H12	TTATAT
13	6	Ex15_M6B_CD4_spl	Spleen	CD4+	spleen_CD4	Miltenyi	1000000	193.6	8.4	13	19.2	630	0.6869	13.1885	32.2063	A10	AACAATGG	D11	TGCAAG
14	6	Ex15_M6B_CD8_spl	Spleen	CD8+	spleen_CD8	Miltenyi	1000000	230.4	8.2	13	10.9	633	0.6978	7.60602	18.4859	A10	AACAATGG	E11	AGCATG
15	8	Ex15_M8A_DP_pre	Thymus	CD4+ CD8+ CD3+ Ann- Nur77-	DP_pre	FACS	600000	38.4	8.2	16	7.81	615	0.8339	6.51276	16.2921	C10	GAAGGAAG	D12	TTAATC
16	8	Ex15_M8A_DP_pos	Thymus	CD4+ CD8+ CD3+ Ann- Nur77+	DP_pos	FACS	759000	63.2	8.1	16	17.2	611	0.8583	14.7628	37.1717	C10	GAAGGAAG	E12	AGGTGC
17	8	Ex15_M8A_DP_DBN	Thymus	CD4+ CD8+ CD3+ Ann+ Nur77-	DP_DBN	FACS	385000	all	6.5	16	1.4	620	0.7013	0.98182	2.43628	C10	GAAGGAAG	F12	CTGTGG
18	8	Ex15_M8A_CD4_negS	Thymus	CD4+ CD3+ Ann+	CD4_negS	FACS	89000	all	4	16	0.58	629	0.7164	0.415512	1.01629	C10	GAAGGAAG	G12	GCCGCA
19	8	Ex15_M8A_CD8_negS	Thymus	CD8+ CD3+ Ann+	CD8_negS	FACS	62000	all	3.6	16	0.411	635	0.5309	0.2182	0.528649	C10	GAAGGAAG	H12	TTATAT
20	8	Ex15_M8A_CD4_spl	Spleen	CD4+	spleen_CD4	Miltenyi	300000	48.96	8	16	10.1	607	0.8316	8.39916	21.2879	C10	GAAGGAAG	D11	TGCAAG
21	8	Ex15_M8A_CD8_spl	Spleen	CD8+	spleen_CD8	Miltenyi	300000	94.56	6.9	16	7.45	628	0.7845	5.84452	14.3178	C10	GAAGGAAG	E11	AGCATG
22	8	Ex15_M8B_DP_pre	Thymus	CD4+ CD8+ CD3+ Ann- Nur77-	DP_pre	FACS	600000	38.4	8.2	16	11.4	633	0.6832	7.78848	18.9293	C10	GAAGGAAG	D12	TTAATC
23	8	Ex15_M8B_DP_pos	Thymus	CD4+ CD8+ CD3+ Ann- Nur77+	DP_pos	FACS	759000	63.2	8.1	16	19.3	633	0.738	14.2434	34.6176	C10	GAAGGAAG	E12	AGGTGC
24	8	Ex15_M8B_DP_DBN	Thymus	CD4+ CD8+ CD3+ Ann+ Nur77-	DP_DBN	FACS	385000	all	6.5	16	3.44	637	0.534	1.83696	4.43657	C10	GAAGGAAG	F12	CTGTGG
25	8	Ex15_M8B_CD4_negS	Thymus	CD4+ CD3+ Ann+	CD4_negS	FACS	89000	all	4	16	1.49	645	0.1186	0.176714	0.4215	C10	GAAGGAAG	G12	GCCGCA
26	8	Ex15_M8B_CD8_negS	Thymus	CD8+ CD3+ Ann+	CD8_negS	FACS	62000	all	3.6	16	3.12	637	0.4344	1.35533	3.27334	C10	GAAGGAAG	H12	TTATAT
27	8	Ex15_M8B_CD4_spl	Spleen	CD4+	spleen_CD4	Miltenyi	300000	48.96	8	16	6.86	629	0.6551	4.49399	10.9918	C10	GAAGGAAG	D11	TGCAAG
28	8	Ex15_M8B_CD8_spl	Spleen	CD8+	spleen_CD8	Miltenyi	300000	94.56	6.9	16	9.48	630	0.6978	6.61514	16.1542	C10	GAAGGAAG	E11	AGCATG
29	9	Ex15_M9A_DP_pre	Thymus	CD4+ CD8+ CD3+ Ann- Nur77-	DP_pre	FACS	500000	45.6		15	15.2	607	1	15.2	38.5249	H10	TCTGCAAG	D12	TTAATC
30	9	Ex15_M9A_DP_pos	Thymus	CD4+ CD8+ CD3+ Ann- Nur77+	DP_pos	FACS	500000	51.2		15	14.9	612	0.8343	12.4311	31.2495	H10	TCTGCAAG	E12	AGGTGC
31	9	Ex15_M9A_DP_DBN	Thymus	CD4+ CD8+ CD3+ Ann+ Nur77-	DP_DBN	FACS	139000	all		15	3.11	615	0.7345	2.2843	5.71431	H10	TCTGCAAG	F12	CTGTGG
32	9	Ex15_M9A_CD4_negS	Thymus	CD4+ CD3+ Ann+	CD4_negS	FACS	93000	all		15	1.7	618	0.6721	1.14257	2.84434	H10	TCTGCAAG	G12	GCCGCA
33	9	Ex15_M9A_CD8_negS	Thymus	CD8+ CD3+ Ann+	CD8_negS	FACS	30000	all		15	0.919	647	0.4445	0.408496	0.971336	H10	TCTGCAAG	H12	TTATAT
34	9	Ex15_M9A_CD4_spl	Spleen	CD4+	spleen_CD4	Miltenyi	300000	71.52		15	18	609	0.8746	15.7428	39.7696	H10	TCTGCAAG	D11	TGCAAG
35	9	Ex15_M9A_CD8_spl	Spleen	CD8+	spleen_CD8	Miltenyi	300000	104.64		15	14.6	624	0.8228	12.0129	29.6176	H10	TCTGCAAG	E11	AGCATG
36	9	Ex15_M9B_DP_pre	Thymus	CD4+ CD8+ CD3+ Ann- Nur77-	DP_pre	FACS	500000	45.6		15	20.1	625	0.9069	18.2287	44.8706	H10	TCTGCAAG	D12	TTAATC
37	9	Ex15_M9B_DP_pos	Thymus	CD4+ CD8+ CD3+ Ann- Nur77+	DP_pos	FACS	500000	51.2		15	17.7	627	0.6993	12.3776	30.3708	H10	TCTGCAAG	E12	AGGTGC
38	9	Ex15_M9B_DP_DBN	Thymus	CD4+ CD8+ CD3+ Ann+ Nur77-	DP_DBN	FACS	139000	all		15	8.6	626	0.6131	5.27266	12.9581	H10	TCTGCAAG	F12	CTGTGG
39	9	Ex15_M9B_CD4_negS	Thymus	CD4+ CD3+ Ann+	CD4_negS	FACS	93000	all		15	3.78	632	0.1807	0.683046	1.66272	H10	TCTGCAAG	G12	GCCGCA
40	9	Ex15_M9B_CD8_negS	Thymus	CD8+ CD3+ Ann+	CD8_negS	FACS	30000	all		15	1.96	638	0.1742	0.341432	0.823323	H10	TCTGCAAG	H12	TTATAT
41	9	Ex15_M9B_CD4_spl	Spleen	CD4+	spleen_CD4	Miltenyi	300000	71.52		15	14.9	626	0.6839	10.1901	25.0433	H10	TCTGCAAG	D11	TGCAAG
42	9	Ex15_M9B_CD8_spl	Spleen	CD8+	spleen_CD8	Miltenyi	300000	104.64		15	15.5	646	0.8276	12.8278	30.5497	H10	TCTGCAAG	E11	AGCATG
