# Supplementary figures and images for: Quantifying changes in the T cell receptor repertoire during thymic development
Source: eLife journal article supplement (doi:10.7554/elife.81622), 2023-01-20

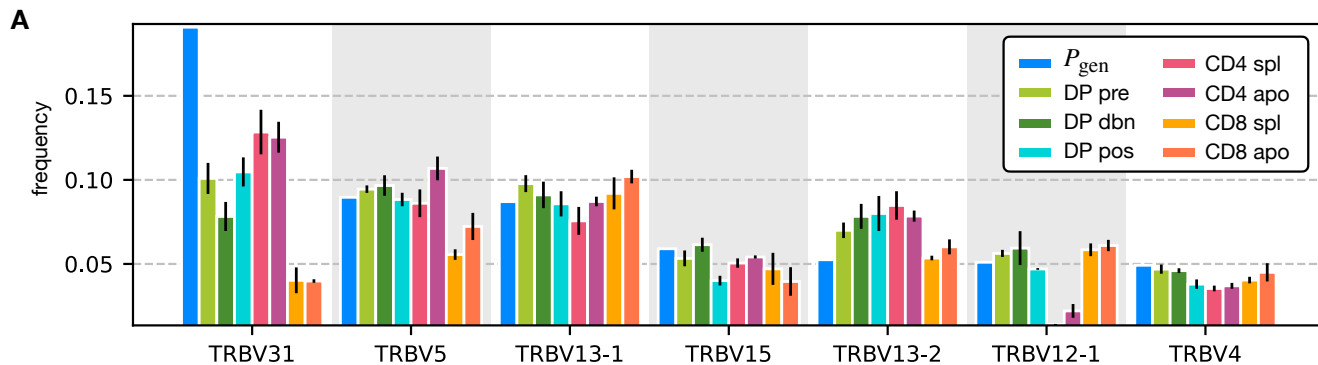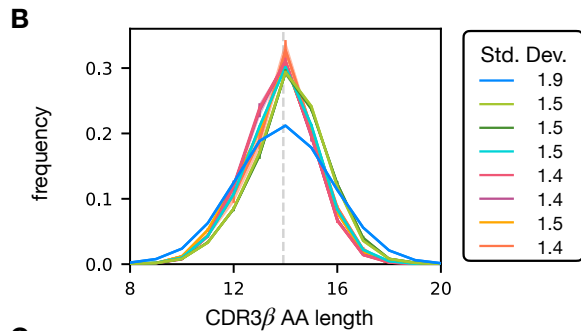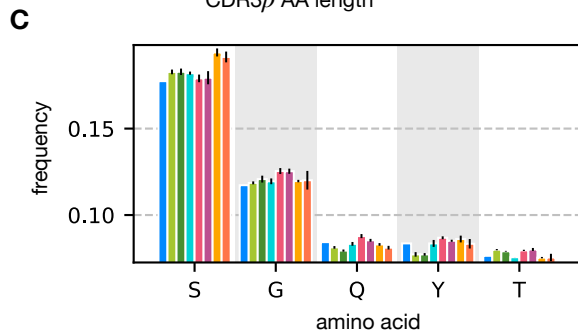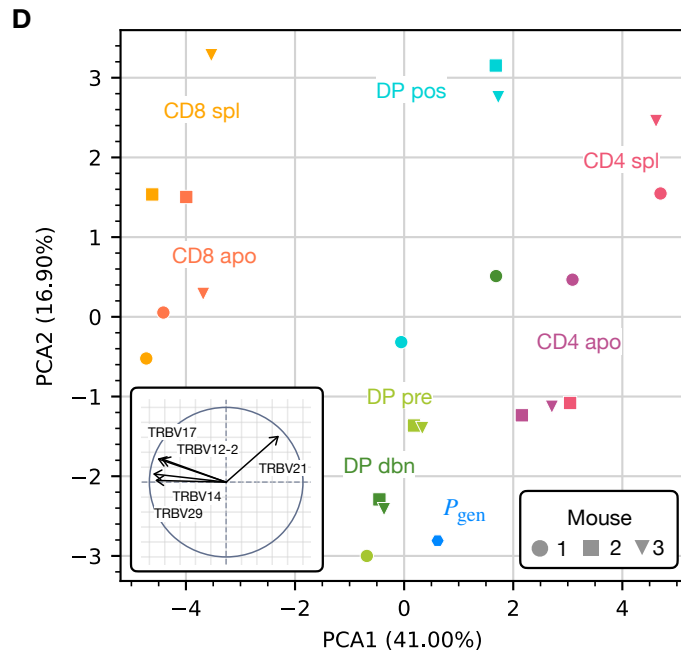

Supplement: supp [file elife-81622-supp-v1.zip]

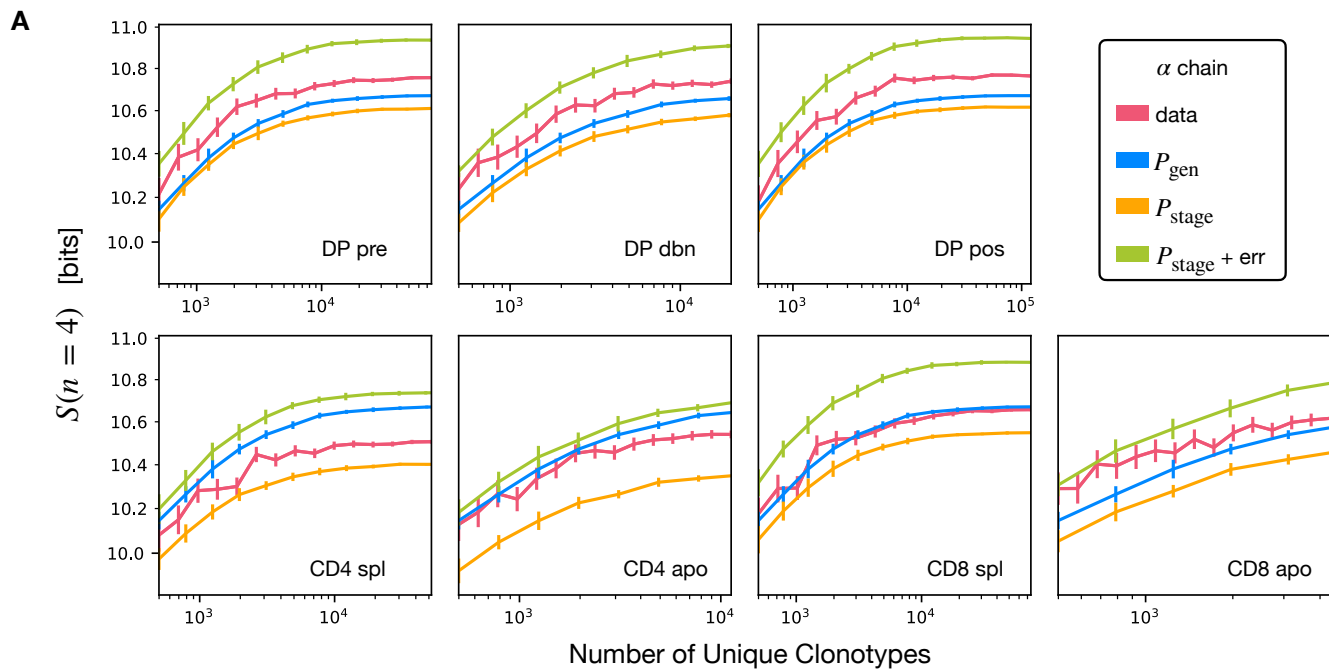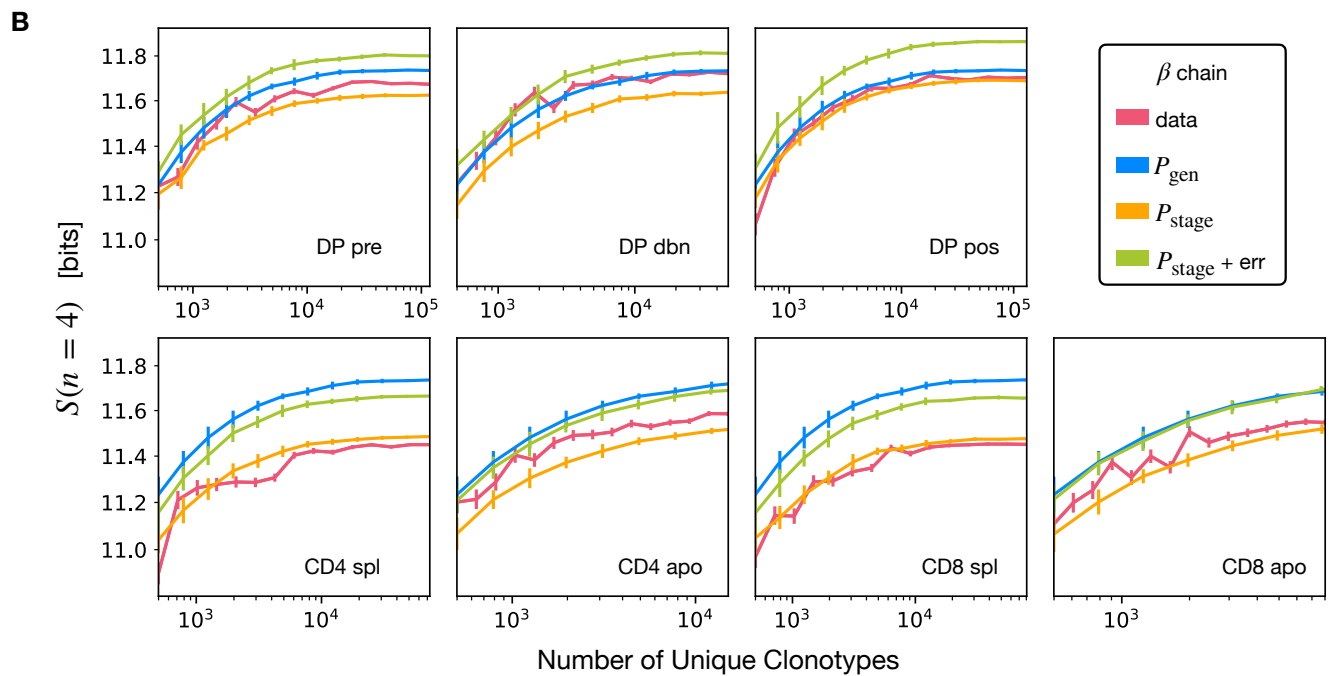

Supplement: supp [file elife-81622-supp-v1.zip]

**A**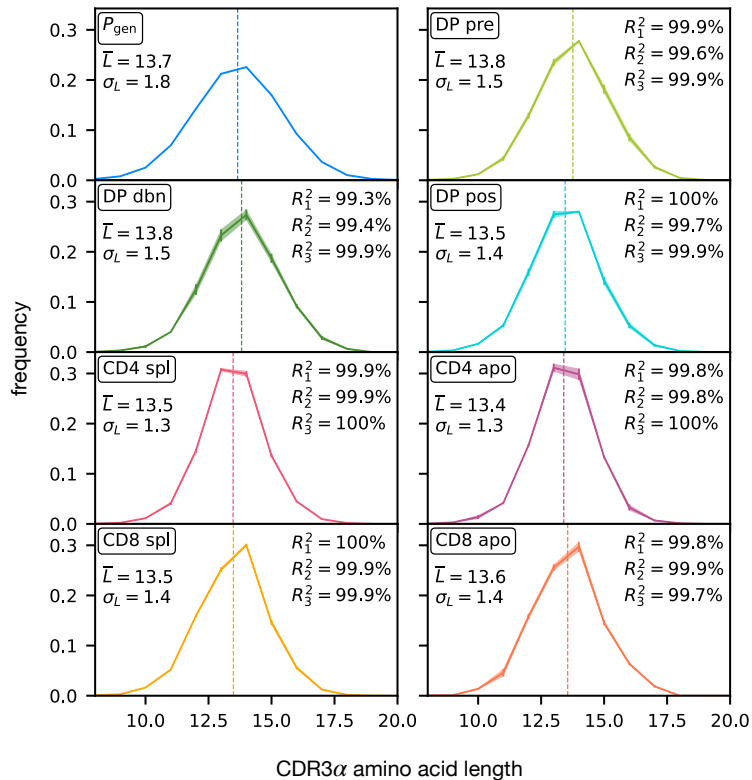**B**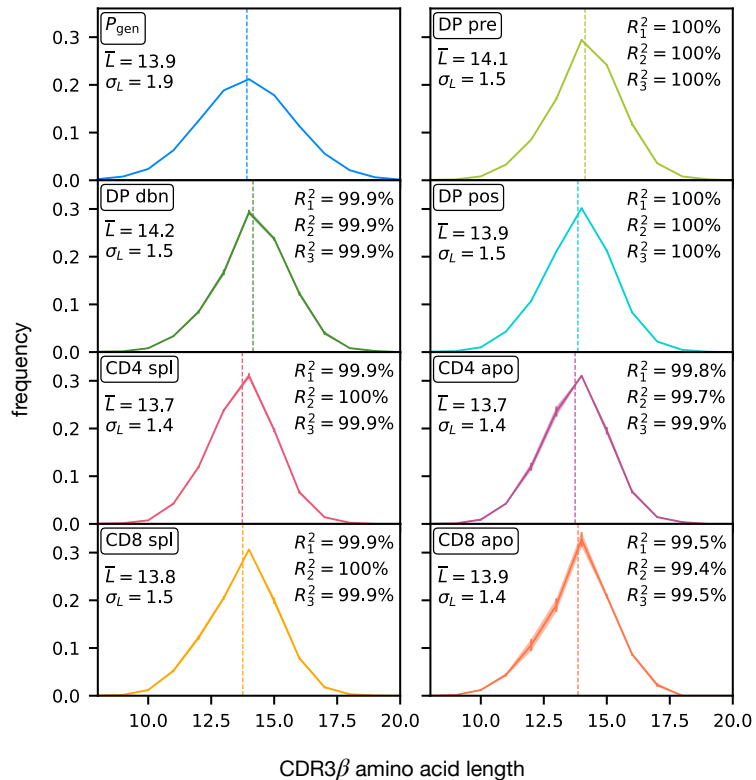

Supplement: supp [file elife-81622-supp-v1.zip]

**A**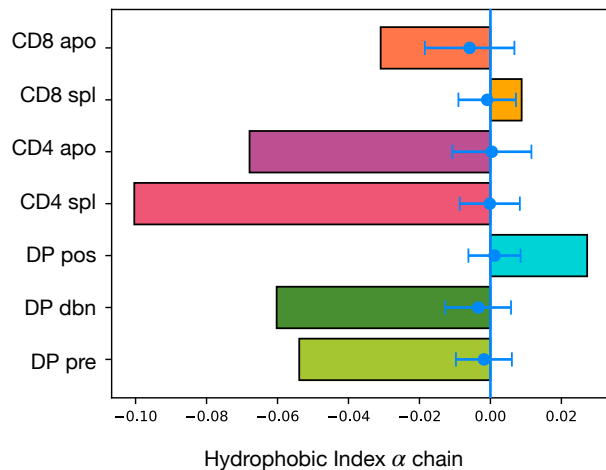**B**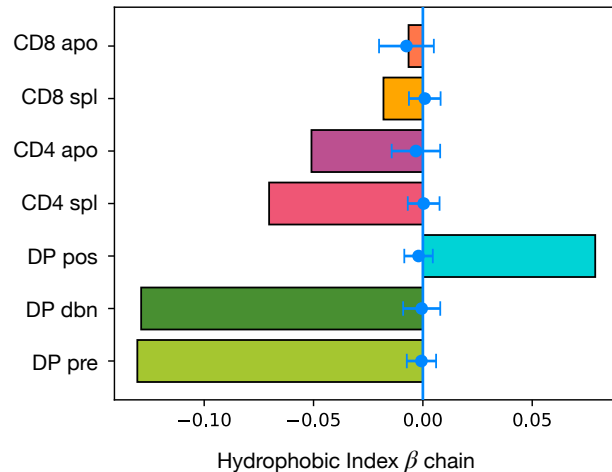**C**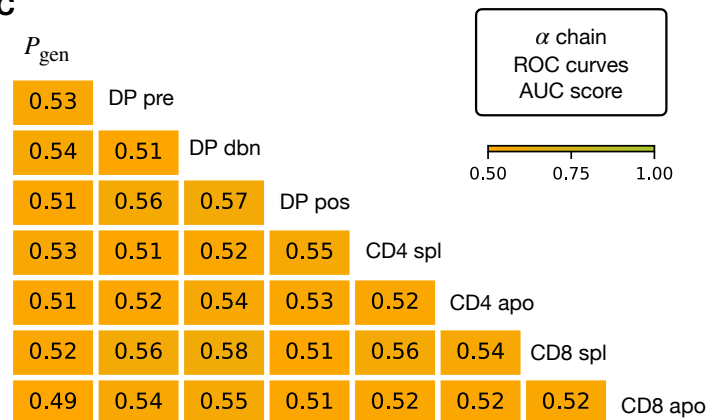**D**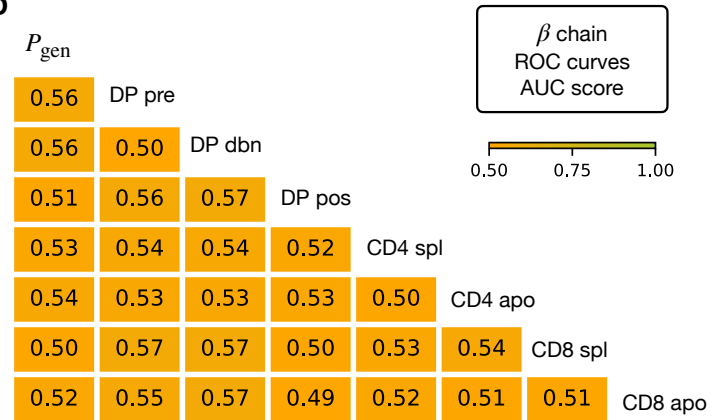

Supplement: supp [file elife-81622-supp-v1.zip]

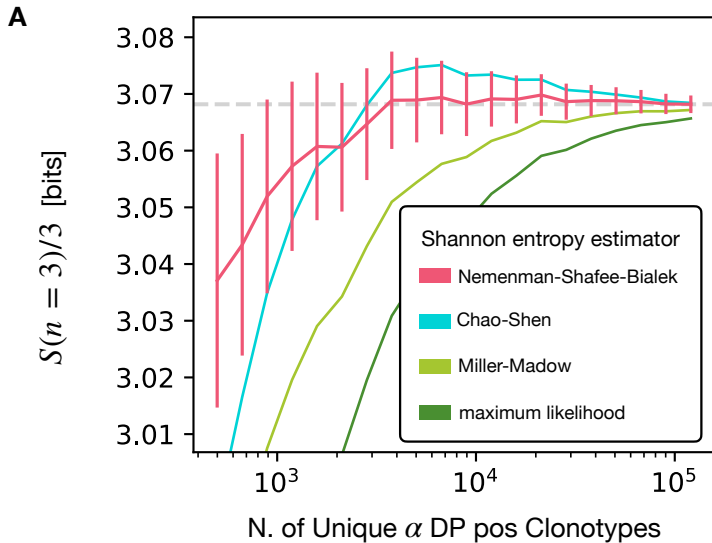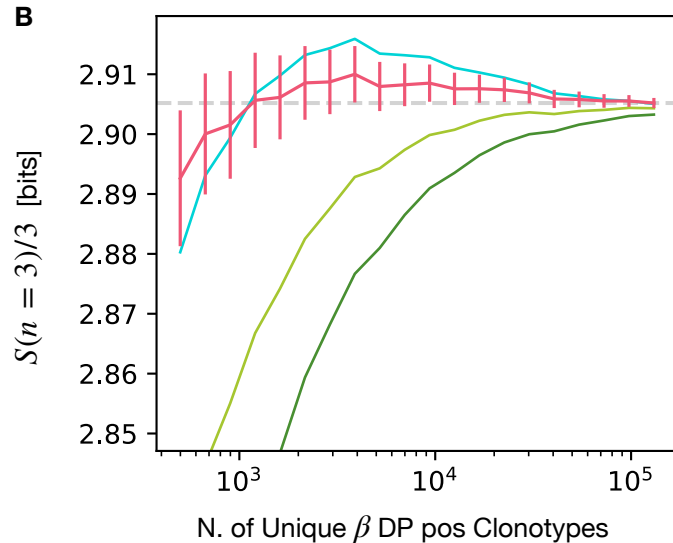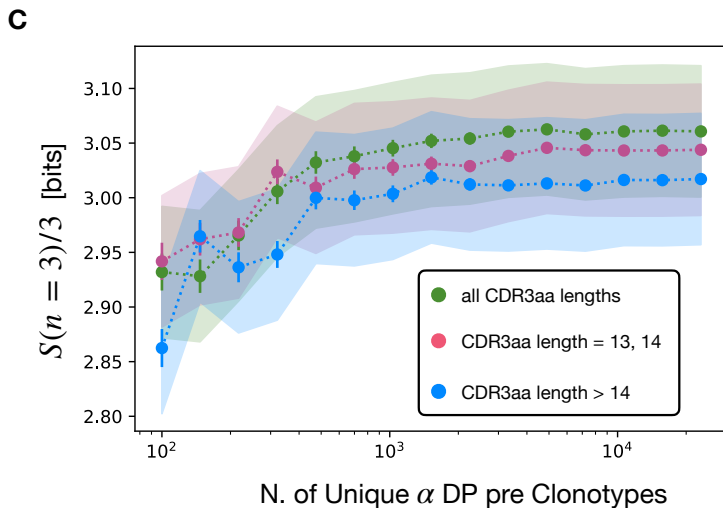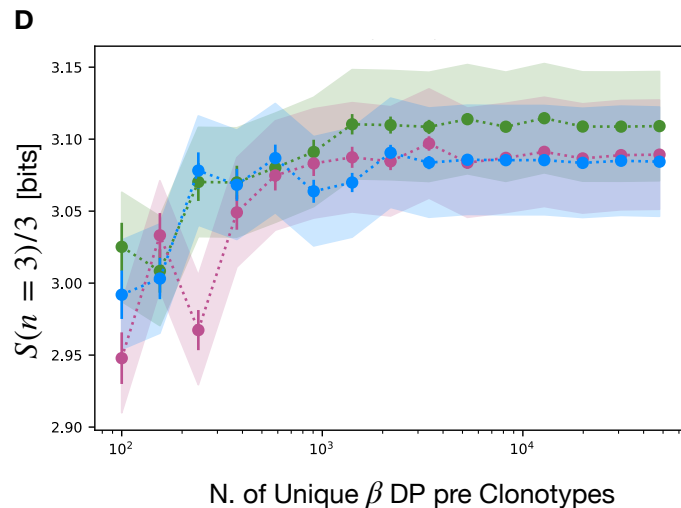

Supplement: supp [file elife-81622-supp-v1.zip]

**A**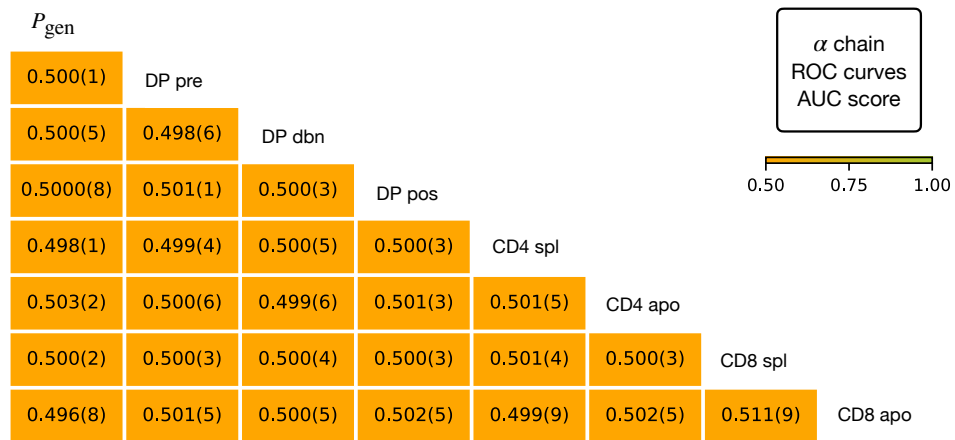**B**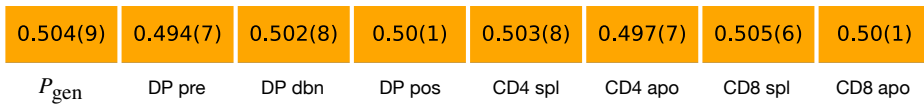**C**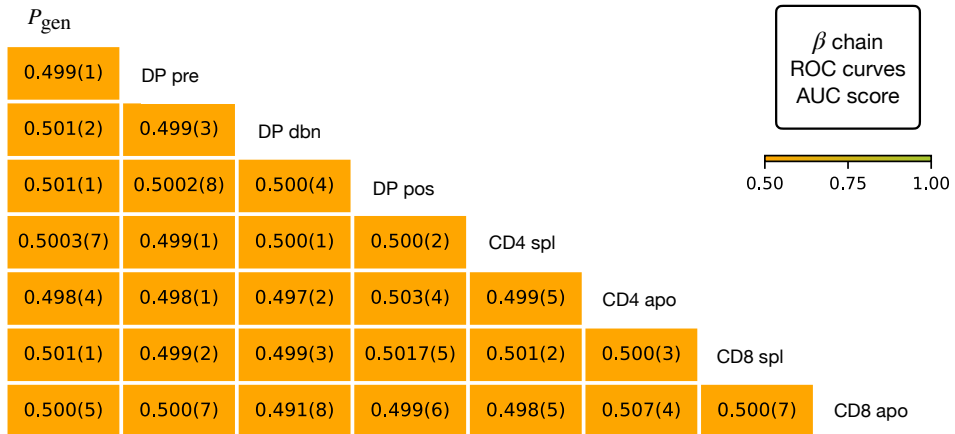**D**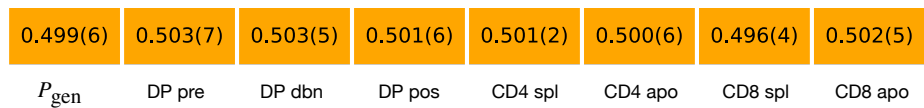

Supplement: supp [file elife-81622-supp-v1.zip]

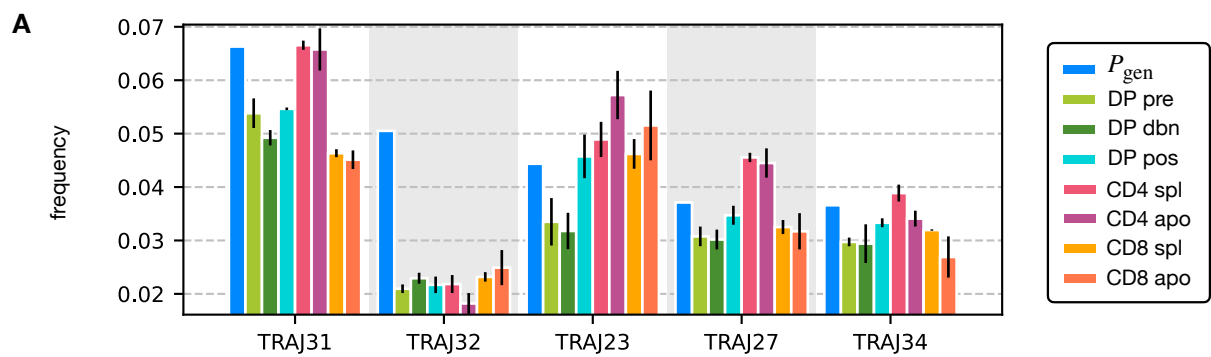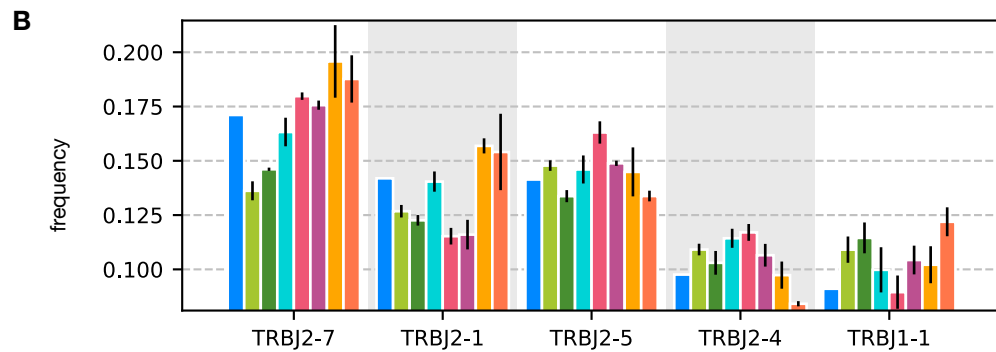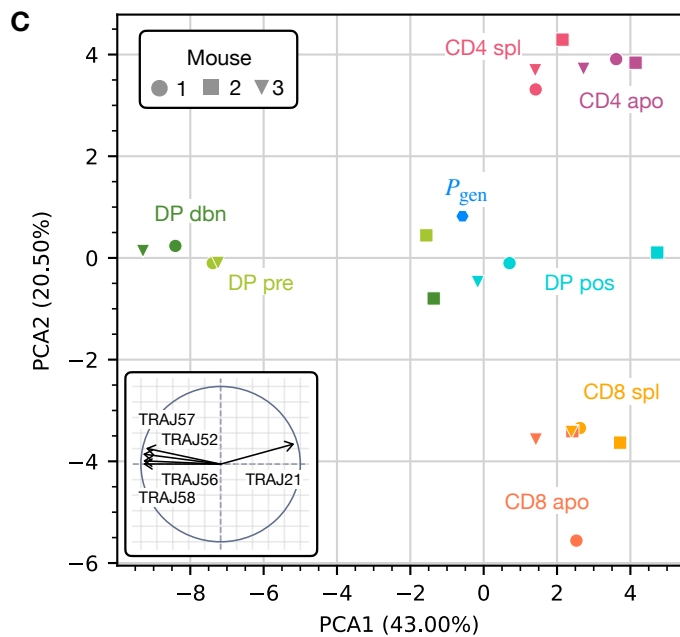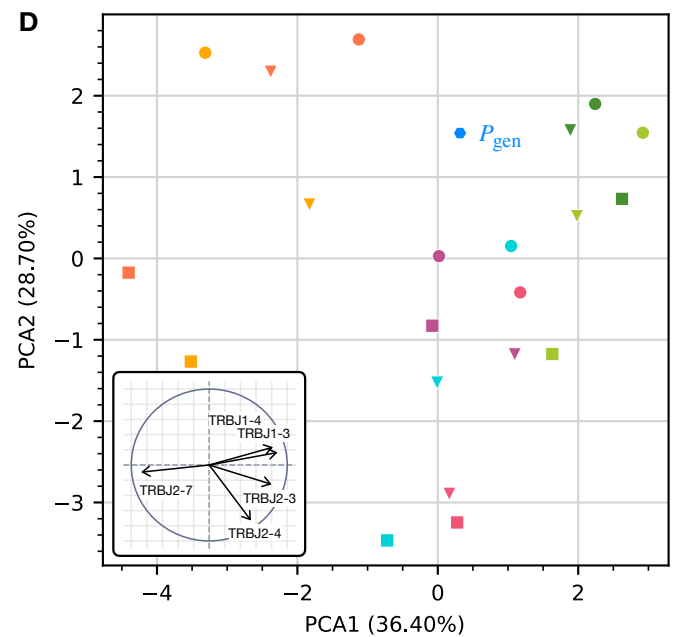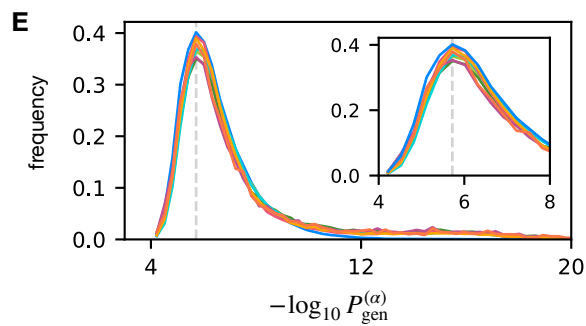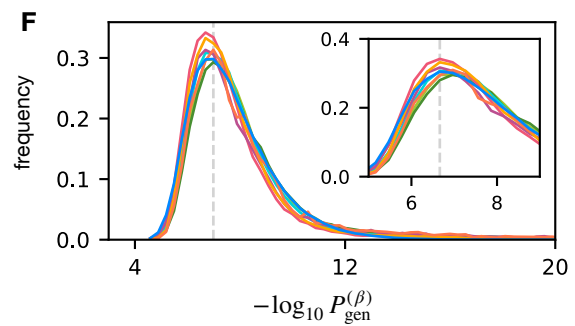

Supplement: supp [file elife-81622-supp-v1.zip]

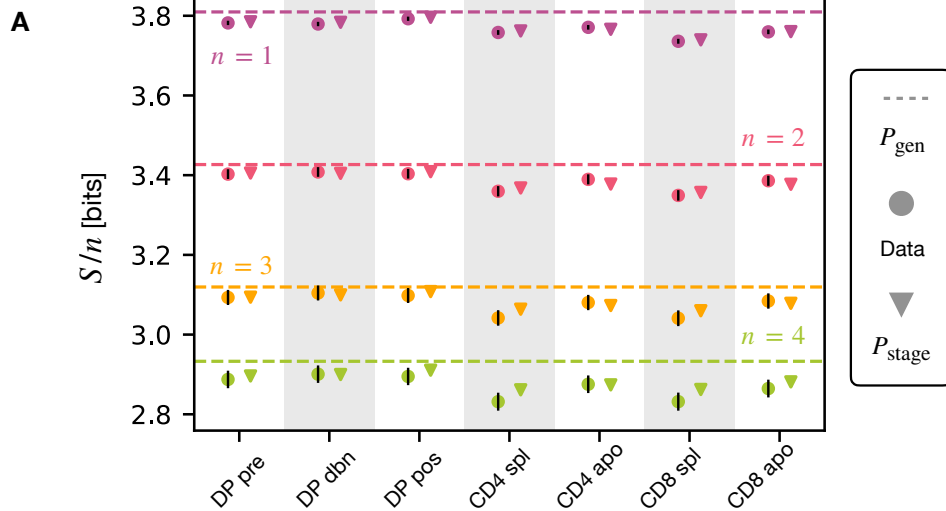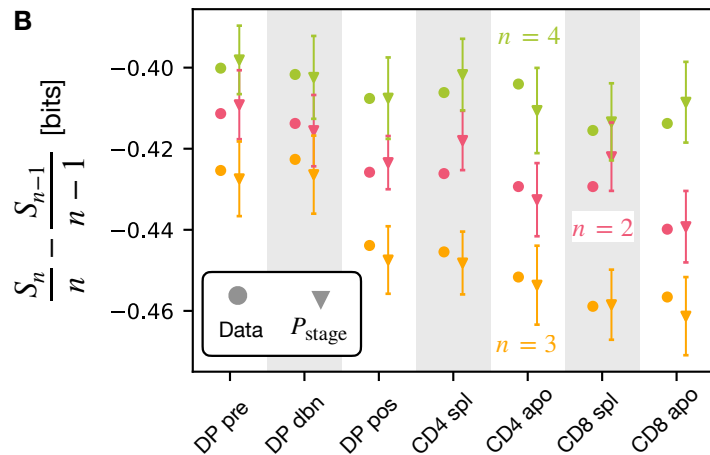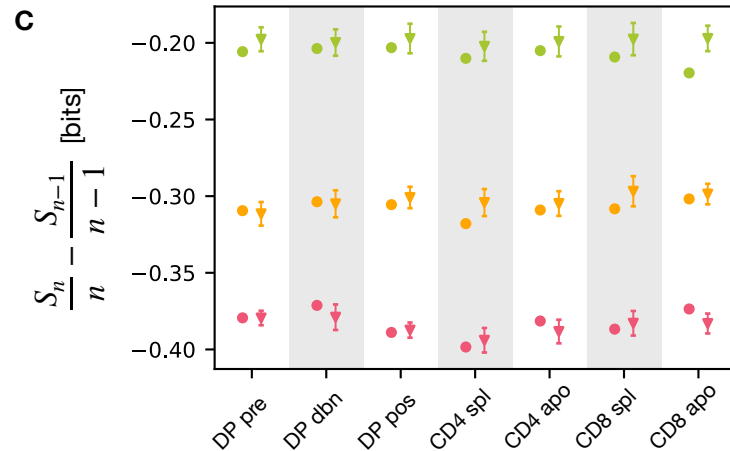

Supplement: supp [file elife-81622-supp-v1.zip]

**A**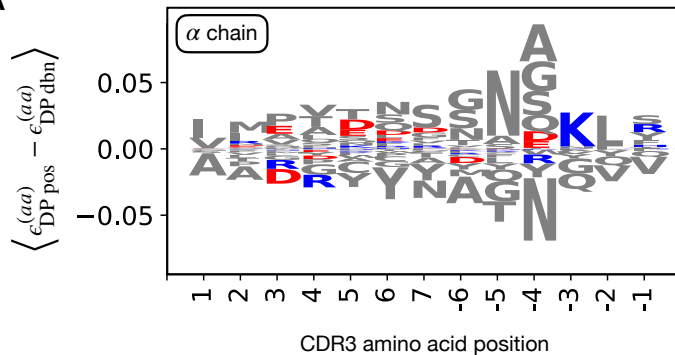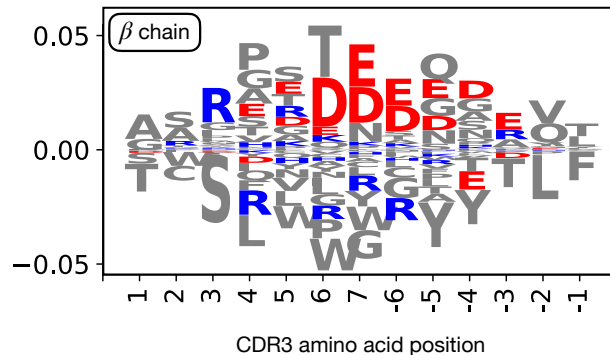**B**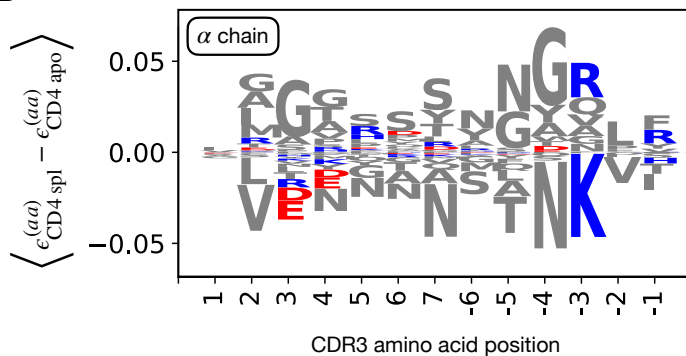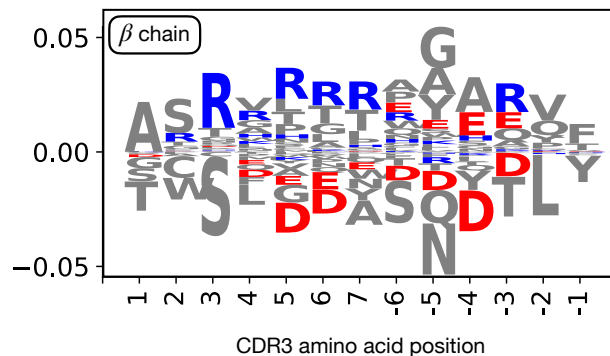**C**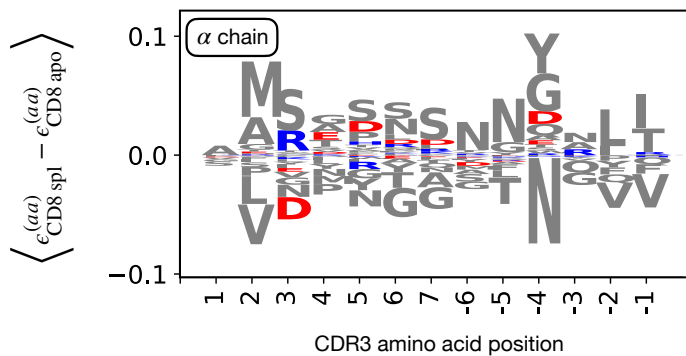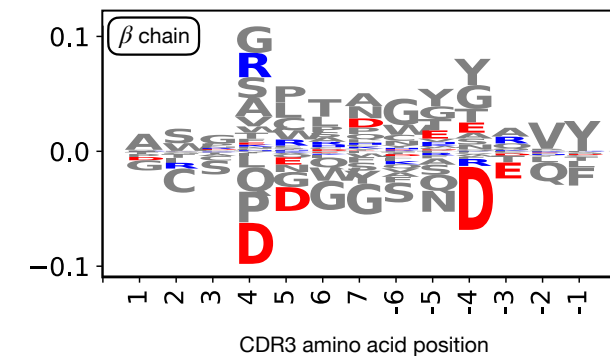

Supplement: supp [file elife-81622-supp-v1.zip]

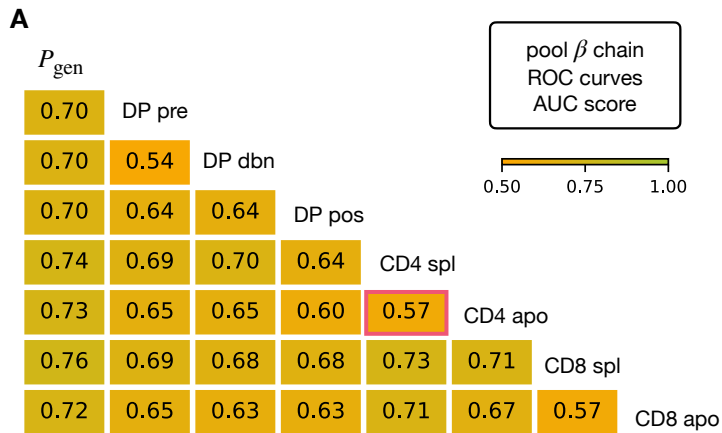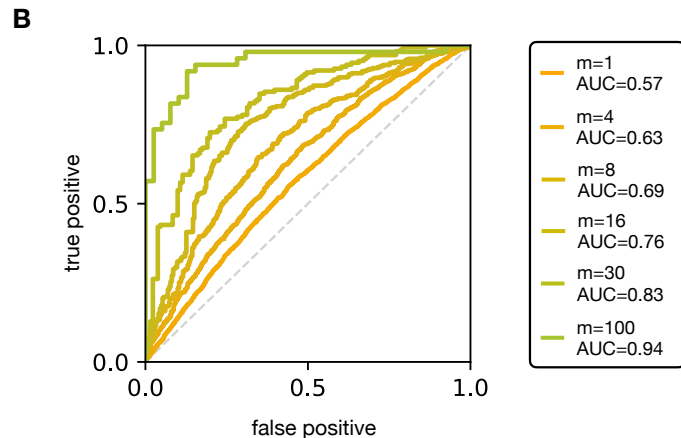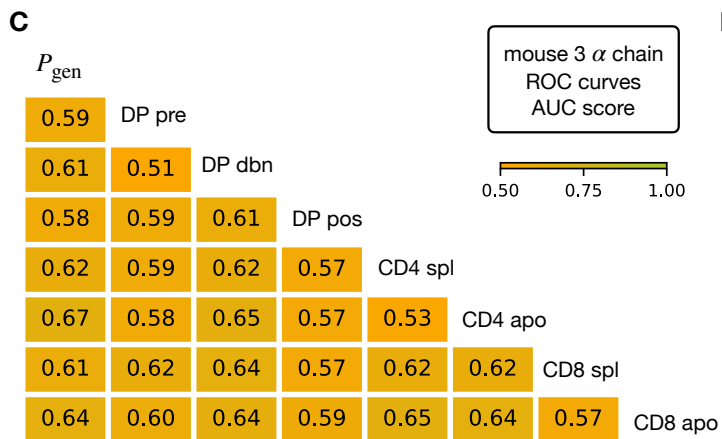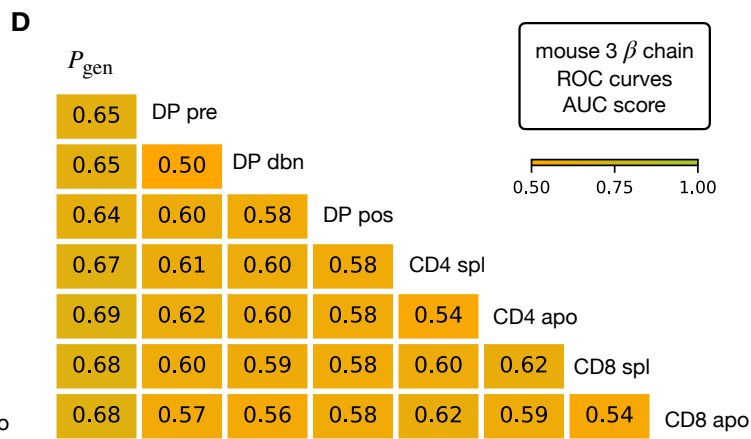

Supplement: supp [file elife-81622-supp-v1.zip]

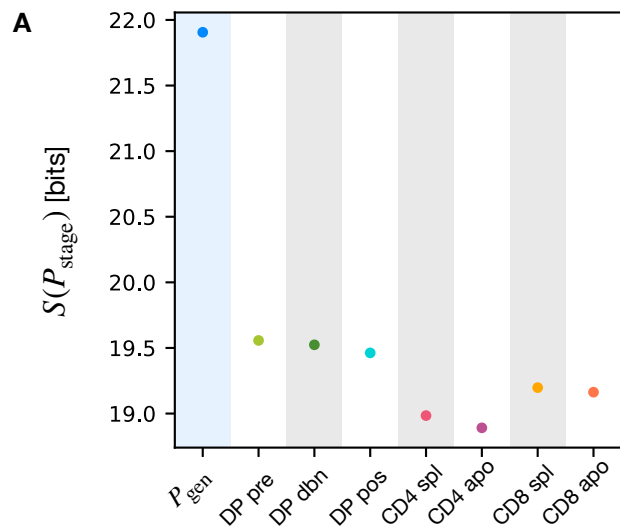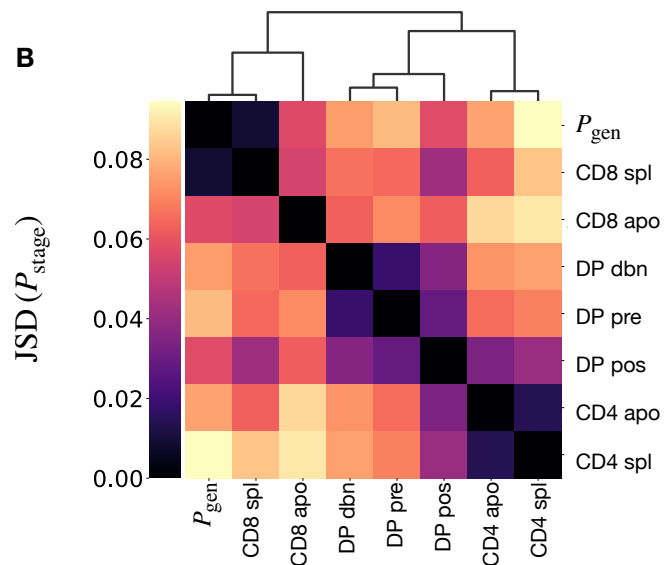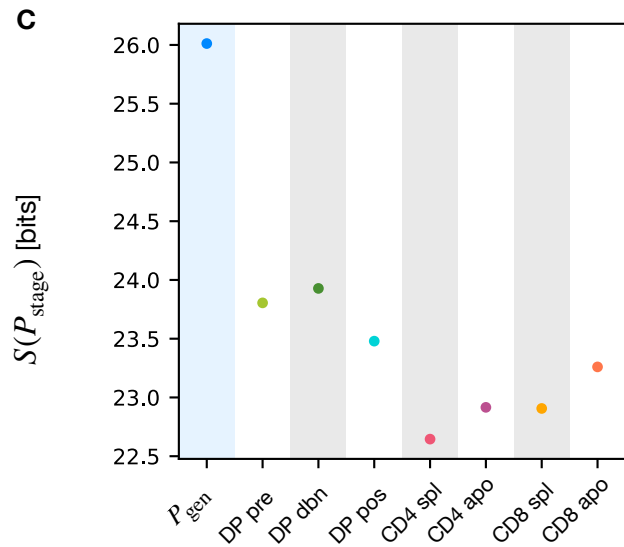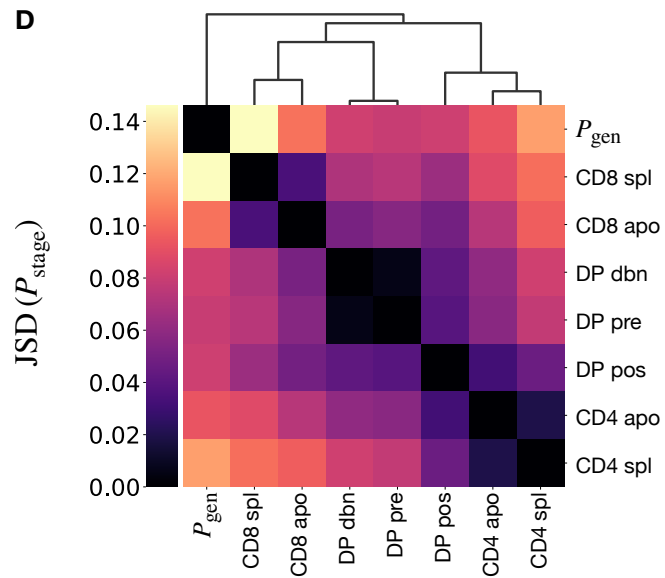

Supplement: supp [file elife-81622-supp-v1.zip]

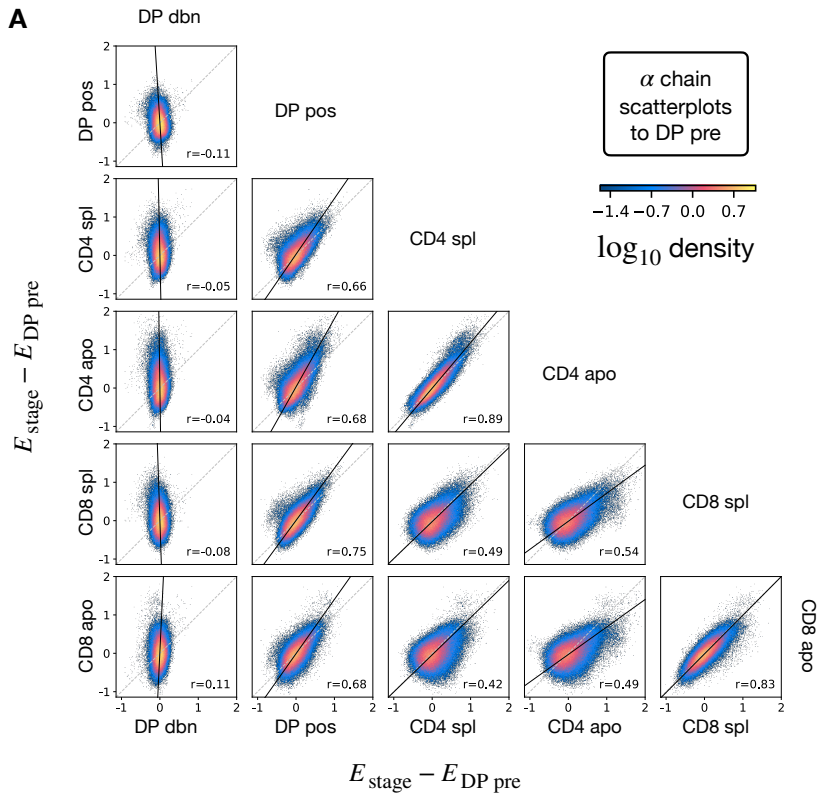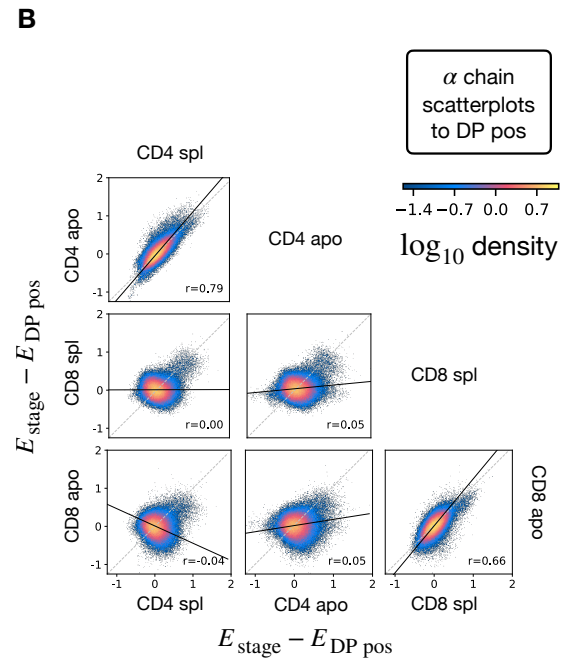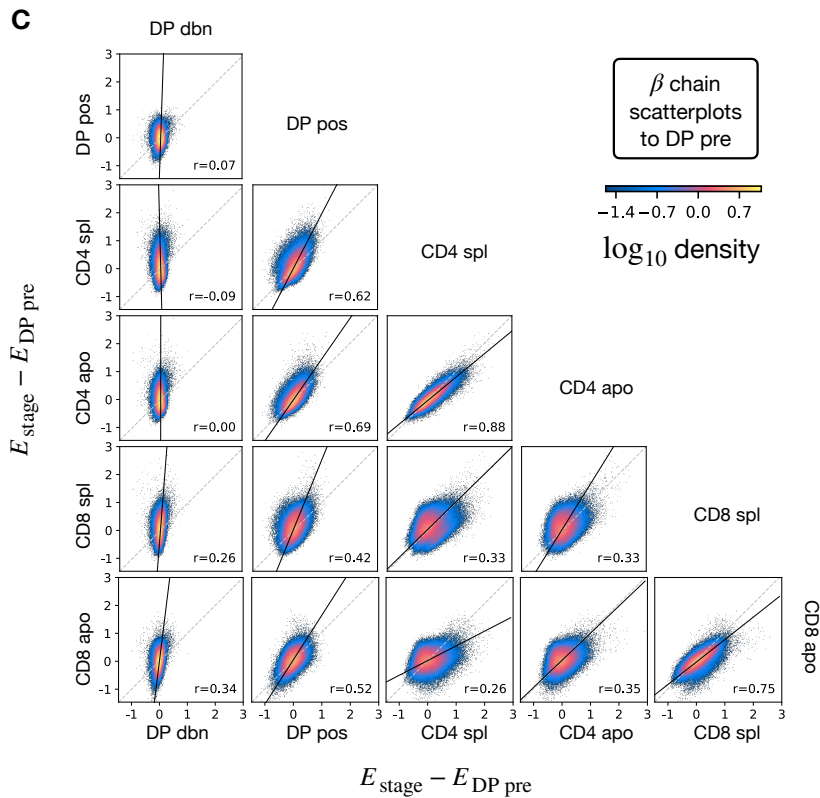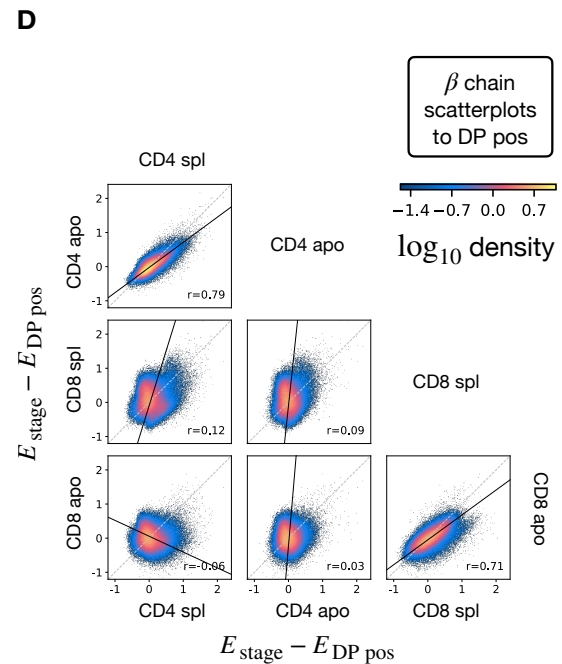

Supplement: supp [file elife-81622-supp-v1.zip]

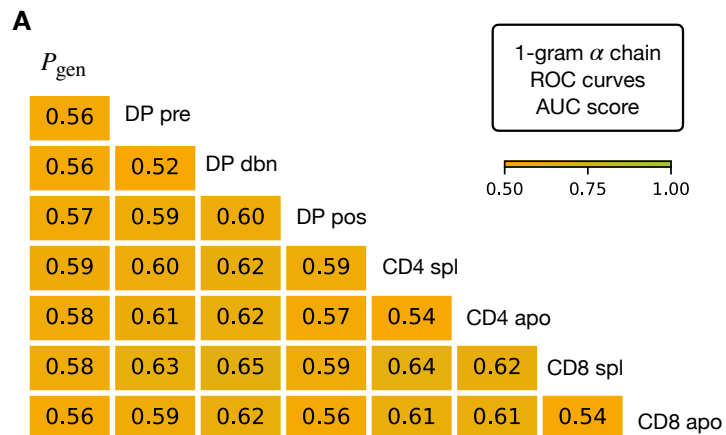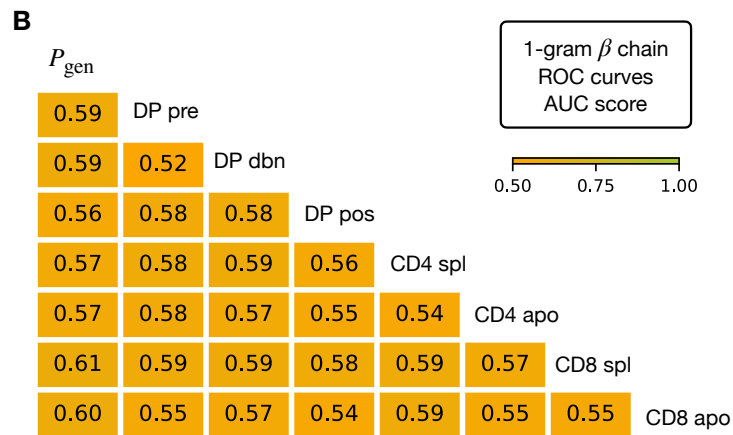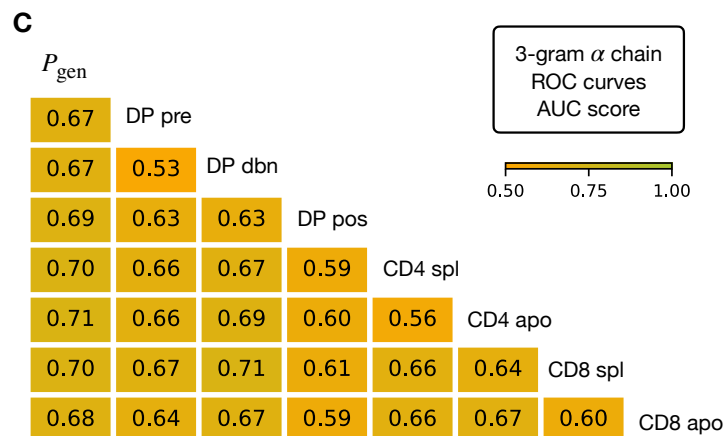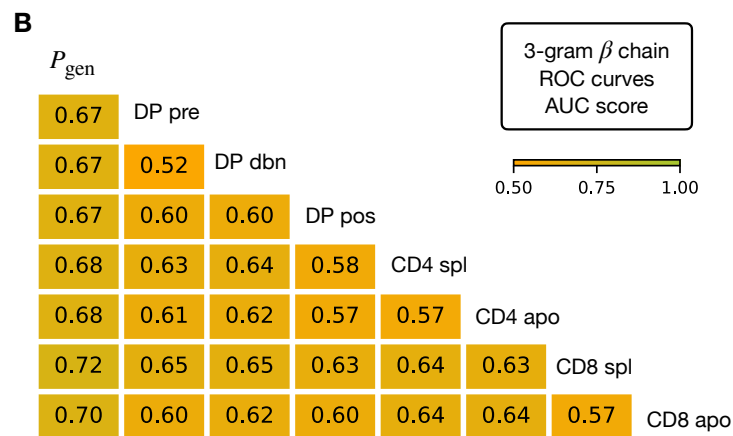

Supplement: supp [file elife-81622-supp-v1.zip]

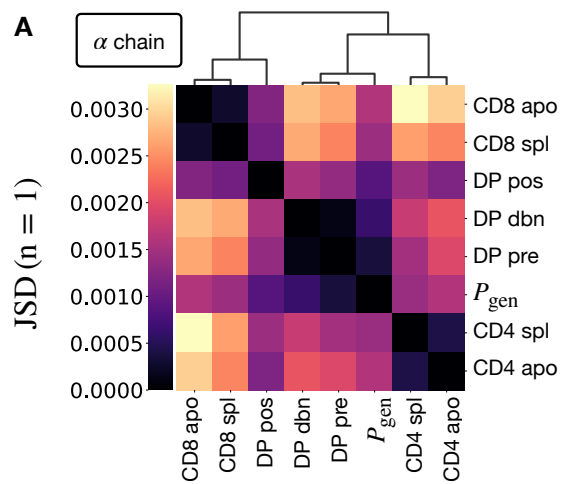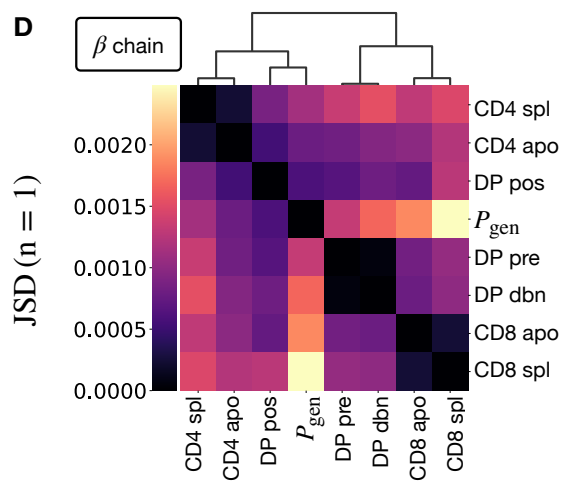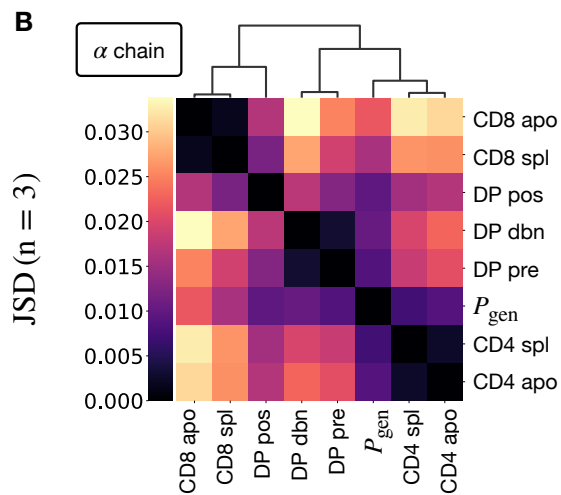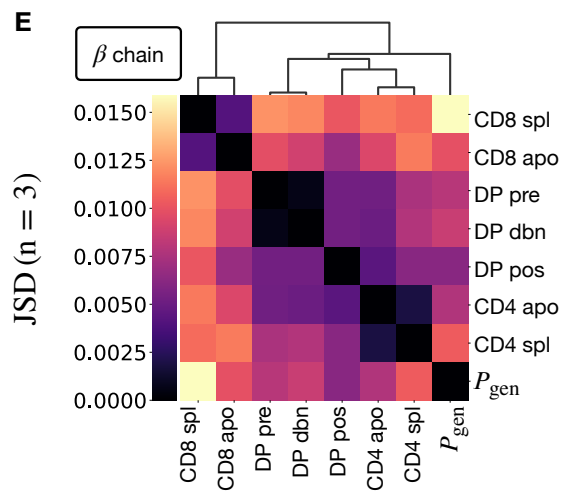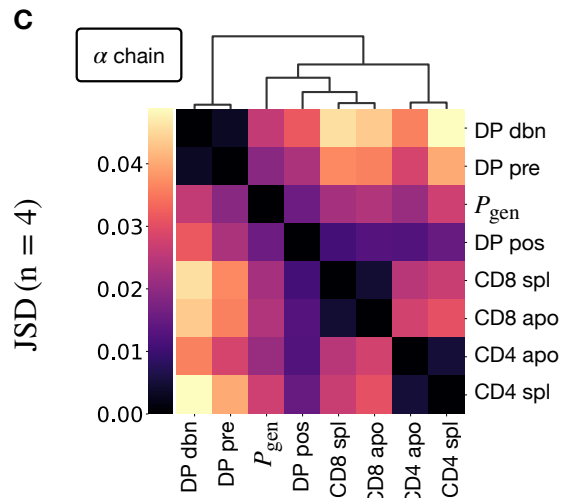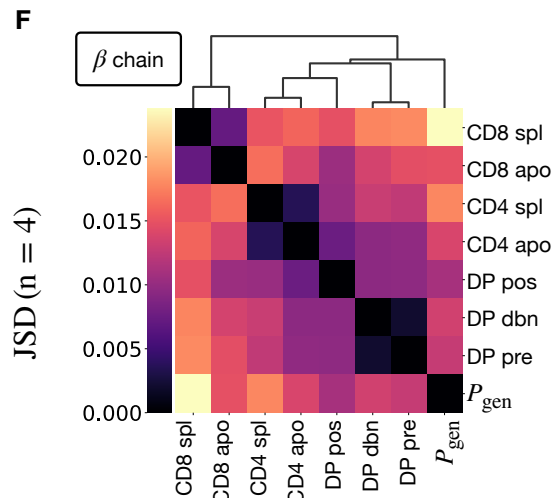

Supplement: supp [file elife-81622-supp-v1.zip]
